# Supplementary material for: Handling Permutation in Sequence Comparison: Genome-Wide Enhancer Prediction in Vertebrates by a Novel Non-Linear Alignment Scoring Principle
Source: PLoS One. 2015 Oct 27;10(10):e0141487. doi: 10.1371/journal.pone.0141487 (PMC4624239; doi:10.1371/journal.pone.0141487)
Supplement: S2 Table — (XLSX) [file pone.0141487.s007.xlsx]

## Sheet: Sheet1
For construct	Organism	Target region	FWD primer	REV primer	Restriction site
hs394:hg19	Homo sapiens	hg19:chr2:59746377-59746992	GACCTTAAGCTTCTTCTTCAGGAAATTCAAAA	GACCTTAAGCTTAAGCATATCCTGCCAAGGAA	HindIII
hs394:ol2-1	Oryzias latipes	ol2:chr15:7016932-7017682	GACCTTAAGCTTATCCCAACTTGACTCCATAATAAGC	GACCTTAAGCTTGAACCAGCGAGCTTCTACACC	HindIII
hs1535:hg19	Homo sapiens	hg19:chr2:60498057-60502013	GACCTTAAGCTTCTTGCATCCTAGGCTGTTCC	GACCTTAAGCTTTAGCGTAACAGAGGCCAAGC	HindIII
hs1535:ol2-1	Oryzias latipes	ol2:chr15:7226761-7230869	GACCTTATCGATAAGGGACTTGTGAGCATCTTTTGG	GACCTTATCGATTTTGATTTCTGAGCCTCATTTAGCC	ClaI
hs1344:hg19	Homo sapiens	hg19:chr3:193660817-193662478	GACCTTAAGCTTTCAAGCCAGCCTCACTTTTT	GACCTTAAGCTTAAATCTGAGAGCCCCACCTT	HindIII
hs1344:ol2-1	Oryzias latipes	ol2:chr4:13568963-13570775	GACCTTAAGCTTAGCGATTATGGGTTGGAATTAAGG	GACCTTAAGCTTCCTTTCAGGTGGTATCACAGC	HindIII
hs1344:ol2-2	Oryzias latipes	ol2:chr22:2742505-2744352	GACCTTAAGCTTCCTTTGAAATCATAATCAGACAGCTGCC	GACCTTAAGCTTCAGTATTTAACAGAAGAATGGTCCGC	HindIII
hs1344:ol2-1	Oryzias latipes	ol2:chr4:13570235-13570260:1	-	AACACAAACATCATTCTGATTGGGCCTGATGGACTGAAGGG	None
delta
hs1344:ol2-1	Oryzias latipes	ol2:chr4:13570663-13570692:-1	ATCAGGCCCAATCAGAATGATGTTTGTGTTTTTAGGGTGTCTGCG	-	None
delta
hs865:hg19	Homo sapiens	hg19:chr6:50685244-50686237	GACCTTAAGCTTGAATGTCCTTTTTCTCTTTTATTAC	GACCTTAAGCTTGAGGAATCCCTAGAGCTGGAAA	HindIII
hs865:ol2-1	Oryzias latipes	ol2:chr24:19553758-19554746	GACCTTAAGCTTAGCAAAGAGGCCTGGAGATCC	GACCTTAAGCTTCATCTCTGAAAGGTTAATTGACTGG	HindIII
hs865:ol2-2	Oryzias latipes	ol2:chr12:12323733-12324922	GACCTTATCGATTTTGGGAAAGATTGTTTGATGAAAAAGGG	GACCTTATCGATTGATGGAGCTTTCAGGAGGAAACTAATCC	ClaI
hs865:ol2-1	Oryzias latipes	ol2:chr24:24:19553852-19553878:1	-	AGCCCCGGTCGCGTTCGCAGCTGAAGAAAAGGAAGAGAGC	None
delta
hs865:ol2-1	Oryzias latipes	ol2:chr24:19554006-19554030:-1	CTTCAGCTGCGAACGCGACCGGGGCTCCACGAGACCGC	-	None
delta
hs882:hg19	Homo sapiens	hg19:chr13:71533037-71534195	GACCTTAAGCTTCACCAAAGAGAACTGCAAAGGATATTTCAA	GACCTTAAGCTTTGTGCTAAAAATTCCCATCAAA	HindIII
hs882:ol2-1	Oryzias latipes	ol2:chr21:9408900-9410191	GACCTTATCGATGCACATGAGCTATTGTTTTTATCGG	GACCTTATCGATTGTTTTAAAGTGTTTTTCCAGAGGG	ClaI
hs882:ol2-2	Oryzias latipes	ol2:chr21:9414626-9415925	GACCTTATCGATAAAATAGACCATTTATTGATGGTGC	GACCTTATCGATCATGAATCCAAACATAAAAGTAACC	ClaI
hs848:hg19	Homo sapiens	hg19:chr16:51491799-51493025	GACCTTAAGCTTCACCATGGGCTCTTTCTTTTCCTCAC	GACCTTAAGCTTCAAAATAACAGCAACGACGACA	HindIII
hs848:ol2-1	Oryzias latipes	ol2:chr3:29251568-29252933	GACCTTAAGCTTGTAACCTCTGTATATAGTCTAAATTGG	GACCTTAAGCTTGTGAATGATTTATATACTTTTATCTCCC	HindIII
hs590:hg19	Homo sapiens	hg19:chr18:34719386-34720720	GACCTTAAGCTTCCAAGTATGCCCAGAAATGGTA	GACCTTAAGCTTAGCATCTGATGGAGCTGTTAAA	HindIII
hs590:ol2-1	Oryzias latipes	ol2:chr5:16698574-16700002	GACCTTAAGCTTACTCACCCATCAATAGTCAATCC	GACCTTAAGCTTACATGCCCTTGTTTTACTCTTTTGC	HindIII
hs1049:hg19	Homo sapiens	hg19:chr5:92314781-92316083	GACCTTGATATCCCACACCTTTTACAATAGAAAGGAAA	GACCTTGATATCGAGAGTGGGGTATGTTATAATCTGGA	EcoRV
hs1049:ol2-1	Oryzias latipes	ol2:chr9:15278072-15279513	GACCTTAAGCTTCTGGAGGAAACGGAGAAGTGG	GACCTTAAGCTTTGATCGCTGAGTCAGTTTGTAACG	HindIII
hs1831:hg19	Homo sapiens	hg19:chr7:95236622-95240458	GACCTTATCGATCACCAGCCTTGGTTTGTGTAGCA	GACCTTATCGATAAAGGGGGAGAAGGAGACAA	ClaI
hs1831:ol2-1	Oryzias latipes	ol2:chr11:9757716-9761696	GACCTTAAGCTTCAGTTCCGCTCTTCAGTGAGG	GACCTTAAGCTTGGATGCATATTTGTTTGACCAAGC	HindIII
